# Supplementary material for: Model predictions of long-lived storage of organic carbon in river deposits
Source: Copernicus journal article supplement (doi:10.5194/esurf-5-711-2017), 2017-11-03
Supplement: Supplementary file [file esurf-5-711-2017-supplement-title-page.pdf › esurf-5-711-2017-supplement-title-page.pdf]

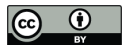

## *Supplement of*

# **Model predictions of long-lived storage of organic carbon in river deposits**

**Mark A. Torres et al.**

*Correspondence to:* Mark A. Torres (mt61@rice.edu)

- esurf-5-711-2017-supplement-title-page.pdf
- TorresetalESurf\_modelScript.m

The copyright of individual parts of the supplement might differ from the CC BY 3.0 License.
